# Supplementary material for: Inhibition Mechanism of Lactiplantibacillus plantarum on the Growth and Biogenic Amine Production in Morganella morganii
Source: MDPI journal article supplement (doi:10.3390/foods12193625), 2023-09-29
Supplement: s1 [file s1]

**Table S1.** Effect of different condition treatments on the biogenic amine production capacity of *Morganella morganii*. <sup>a</sup>

| Biogenic Amine<br>Content (mg/L) | Control Group <sup>b</sup> |                             |                           |                           | Experimental Group <sup>b</sup> |                              |                             |                             |
|----------------------------------|----------------------------|-----------------------------|---------------------------|---------------------------|---------------------------------|------------------------------|-----------------------------|-----------------------------|
|                                  | pH                         |                             |                           |                           | pH                              |                              |                             |                             |
|                                  | 4                          | 5                           | 6                         | 7                         | 4                               | 5                            | 6                           | 7                           |
| Phenylethylamine<br>e            | 0.32 ± 0.01 <sup>f</sup>   | 10.63 ± 2.01 <sup>e</sup>   | 13.40 ± 2.69 <sup>e</sup> | 18.41 ± 4.68 <sup>d</sup> | 0.40 ± 0.05 <sup>f</sup>        | 0.37 ± 0.06 <sup>f</sup>     | 10.34 ± 1.55 <sup>e</sup>   | 14.49 ± 1.06 <sup>d,e</sup> |
| Tryptamine                       | 0.16 ± 0.02 <sup>d</sup>   | 0.16 ± 0.01 <sup>d</sup>    | 0.17 ± 0.02 <sup>d</sup>  | ND <sup>c,e</sup>         | 0.21 ± 0.04 <sup>d</sup>        | 0.21 ± 0.03 <sup>d</sup>     | 0.18 ± 0.05 <sup>d</sup>    | 0.16 ± 0.02 <sup>d</sup>    |
| Cadaverine                       | 2.94 ± 0.02 <sup>g</sup>   | 15.91 ± 2.07 <sup>e</sup>   | 33.64 ± 6.30 <sup>d</sup> | 18.87 ± 1.67 <sup>e</sup> | 3.25 ± 0.18 <sup>f,g</sup>      | 2.68 ± 0.22 <sup>g</sup>     | 8.54 ± 1.43 <sup>f</sup>    | 17.52 ± 2.81 <sup>e</sup>   |
| Putrescine                       | 0.63 ± 0.01 <sup>h</sup>   | 7.69 ± 0.61 <sup>f,g</sup>  | 11.01 ± 2.11 <sup>e</sup> | 31.99 ± 3.26 <sup>d</sup> | 0.65 ± 0.02 <sup>h</sup>        | 1.04 ± 0.02 <sup>h</sup>     | 5.84 ± 1.31 <sup>g</sup>    | 9.98 ± 1.85 <sup>e,f</sup>  |
| Tyramine                         | 2.04 ± 0.09 <sup>d,e</sup> | 2.32 ± 0.34 <sup>d</sup>    | 2.45 ± 0.46 <sup>d</sup>  | 2.23 ± 0.27 <sup>d</sup>  | 2.13 ± 0.29 <sup>de</sup>       | 1.95 ± 0.21 <sup>d,e,f</sup> | 1.38 ± 0.22 <sup>f</sup>    | 1.61 ± 0.31 <sup>e,f</sup>  |
| Histamine                        | 0.4 ± 0.01 <sup>h</sup>    | 33.04 ± 2.53 <sup>d,e</sup> | 36.94 ± 4.91 <sup>d</sup> | 21.40 ± 3.20 <sup>g</sup> | 0.7 ± 0.03 <sup>h</sup>         | 0.63 ± 0.03 <sup>h</sup>     | 27.74 ± 2.59 <sup>e,f</sup> | 25.17 ± 4.12 <sup>f,g</sup> |

<sup>a</sup> Values are expressed as mean ± standard deviation (n = 3). <sup>b</sup> *M. morganii* cultured in blank medium is the control group; *M. morganii* cultured in medium supplemented with *Lpb. plantarum* CFS is the experimental group. <sup>c</sup> ND, the biogenic amine of the samples is less than 0.05 mg/L in wet base content. <sup>d-h</sup> Different letters in the same row indicate a significant difference (P < 0.05, different culture conditions).
